# Supplementary material for: Assessing disease experience across the life span for individuals with osteogenesis imperfecta: challenges and opportunities for patient-reported outcomes (PROs) measurement: a pilot study
Source: Springer Nature journal article supplement (doi:10.1186/s13023-019-1004-x), 2019-01-29
Supplement: MOESM1 [file 16428010]

## Information About You

When answering these questions, "you" means either you or your child. If you have multiple children, please only answer the questions for one child.

Today's Date

\_\_\_\_/\_\_\_\_/\_\_\_\_  
DAY MONTH YEAR

Date of Birth:

\_\_\_\_/\_\_\_\_/\_\_\_\_  
DAY MONTH YEAR

Current Age:

\_\_\_\_ Years [CALCULATED FIELD]

Gender:

Male  Female  Unknown

Race (check all that apply):

- American Indian or Alaska Native
- Asian
- Black or African American
- Native Hawaiian or Other Pacific Islander
- White
- Unknown
- Refused

Ethnicity (select one):

- Hispanic, Latino, or Spanish Origin
- Not Hispanic, Latino, or Spanish Origin
- Unknown
- Refused

Do you know what type of Osteogenesis Imperfecta you have?  Yes  No  Don't Know

Please indicate what type of Osteogenesis Imperfecta you have:

- I - Type 1
- II - Type 2
- III - Type 3
- IV - Type 4
- V - Type 5
- Other
- VI - Type 6
- VII - Type 7
- VIII - Type 8
- IX - Type 9
- Bruck Syndrome

Do you know how your Osteogenesis Imperfecta was diagnosed?  Yes  No  Don't Know  Not Diagnosed

How was your Osteogenesis Imperfecta diagnosed? (Select all that apply)

- Skin Biopsy/collagen studies
- Blood/DNA studies
- Clinical history and radiographs highly suggestive of Osteogenesis Imperfecta

Do other members of your family have Osteogenesis Imperfecta? (Please consider family members who are no longer living.)

Yes  No  Don't Know

Please indicate which members of your family have Osteogenesis Imperfecta (Please include family members who are no longer living): (Select all that apply)

- Mother
- Father
- Sister(s)
- Brother(s)
- Aunt(s)
- Uncle(s)
- Cousin(s)
- Niece(s)
- Nephew(s)
- Granddaughter(s)
- Grandson(s)
- Mother's mother
- Mother's father
- Father's mother

## Information About You

When answering these questions, "you" means either you or your child. If you have multiple children, please only answer the questions for one child.

- Daughter(s)
- Son(s)

- Father's father

What is your means of mobility? *(Select all that apply)*

- Walk unaided
- Walk with crutches or walker
- Walk with leg braces
- Walk with cane
- Manual wheelchair
- Other

- Electric wheelchair
- Use wheelchair outside the home only
- Use service dog
- Use service dog outside the home only
- Not mobile

Please specify: \_\_\_\_\_

Does your means of mobility allow you the level of independence that you desire?  Yes  No  Don't Know

How tall are you? (inches): \_\_\_\_\_

Did you have fractures before birth?  Yes  No  Don't Know

Age at time of first fracture? \_\_\_\_\_  Years  Months  Weeks  Don't Know

(If pre-natal or birth, enter 0)

Age at time of most recent fracture? \_\_\_\_\_  Years  Months  Weeks  Don't Know

Approximately how many fractures have you had in your lifetime? \_\_\_\_\_  NA  Don't Know

Approximately how many fractures you had from age 0-10 years old? \_\_\_\_\_  NA  Don't Know

Approximately how many fractures you had from age 11-19 years old? \_\_\_\_\_  NA  Don't Know

Approximately how many fractures you had from age 20-49 years old? \_\_\_\_\_  NA  Don't Know

Approximately how many fractures did you have after the age of 50? \_\_\_\_\_  NA  Don't Know

Have you ever had rodding surgery of your arms or legs?  Yes  No  Don't Know

Have you ever had spine surgery?  Yes  No  Don't Know

Have you ever had chronic or recurrent lung or breathing problems?  Yes  No  Don't Know

Do you have hearing loss?  Yes  No  Don't Know

Do you wear a hearing aid?  Yes  No  Don't Know

Do you have a Cochlear implant?  Yes  No  Don't Know

Have you had a stapedectomy?  Yes  No  Don't Know

Date of most recent hearing exam \_\_\_\_\_  Don't Know

DAY /  MONTH /  YEAR

Have you ever been pregnant?  Yes  No  Not Applicable

How many times have you been pregnant? \_\_\_\_\_

How many times did you deliver (live births)? \_\_\_\_\_

In the last seven days, have you been on any medications, treatments, and/or therapies for the following?

Anxiety  Yes  No  Don't Know

Depression  Yes  No  Don't Know

Fatigue  Yes  No  Don't Know

Pain  Yes  No  Don't Know

Sleep Disturbances  Yes  No  Don't Know

What medications did you take in the last 7 days? \_\_\_\_\_

Do the last seven days represent a typical 7 days for you for the following?

Anxiety  Yes  No  Don't Know Why not? \_\_\_\_\_

Depression  Yes  No  Don't Know Why not? \_\_\_\_\_

## Information About You

When answering these questions, "you" means either you or your child. If you have multiple children, please only answer the questions for one child.

|                    |                       |     |                       |    |                       |            |          |                      |
|--------------------|-----------------------|-----|-----------------------|----|-----------------------|------------|----------|----------------------|
| Fatigue            | <input type="radio"/> | Yes | <input type="radio"/> | No | <input type="radio"/> | Don't Know | Why not? | <input type="text"/> |
| Pain               | <input type="radio"/> | Yes | <input type="radio"/> | No | <input type="radio"/> | Don't Know | Why not? | <input type="text"/> |
| Sleep Disturbances | <input type="radio"/> | Yes | <input type="radio"/> | No | <input type="radio"/> | Don't Know | Why not? | <input type="text"/> |
